# Supplementary material for: Remote assessment in adults with Autism or ADHD: A service user satisfaction survey
Source: PubMed Central journal article supplement (PMC7993762; doi:10.1371/journal.pone.0249237), 2021-03-25
Supplement: pone.0249237.s001.pdf [file pone.0249237.s001.pdf]

**Service User Feedback for ADHD and Autism Assessments during Covid 19**

**Which service have you used?**

- ADHD
- Autism

**What was your assessment for?**

- Diagnostic Assessment
- Medication Review
- Psychological Intervention

---

**1. Were you pleased to receive a telephone / video appointment during the coronavirus restrictions?**

- Yes completely
- Yes to some extent
- No
- Don't know

**2. Would you have preferred a face to face appointment?**

- Yes
- No
- Don't know

**3. Did the appointment letter explain what would happen during the assessment?**

- Yes, completely
- Yes, to some extent
- No
- Don't know

**4. Did you receive support during your appointment?**

- Yes, from a family member
- Yes, from my partner
- Yes, from a carer
- Yes, from someone else
- No

**5. How did we contact you? (tick all that apply)**

- Telephone Consultation
- Video Consultation

**6. If you did not have a video call what was the reason?**

- Not given the option
- Did not have the appropriate equipment
- Did not have internet connection
- Other (please provide detail)

**7. Were you contacted at the agreed time?**

- Yes
- No
- Don't know

**8. How would you rate the quality of the telephone / video call? Please circle.**

*(1 being poor and 5 being excellent)*

1      2      3      4      5

**9. How well do you think you were able to communicate over the telephone / video call?**

- Very well
- Well
- Not very well
- Don't know

**10. Were you able to find somewhere appropriate to speak to your clinician during your telephone / video call?**

- Yes
- No
- Don't know

**11. Did you have enough time to answer the questions?**

- Yes completely
- Yes to some extent
- No
- Don't know

**12. Do you think you would have been able to explain yourself better if you had been seen face to face?**

- Yes completely
- Yes to some extent
- No
- Don't know

**13. Do you feel the clinician completed a detailed initial assessment by telephone / video?**

- Yes
- No
- Don't know

**14. Do you feel it was explained to you what would happen following your assessment?**

- Yes
- No
- Don't know

**15. Do you think we should continue to offer telephone / video appointments after coronavirus restrictions are lifted?**

- Yes
- No
- Don't know

**16. Would you tell your friends and family that this is a good service?**

- Yes
- Maybe
- No
- Don't know

**17. What was good about the service?**

**18. What could have been better?**

---

In order to ensure that we provide the best service for **all** of our communities, and to ensure that we do not knowingly discriminate against any section of society, it is important for us to gather the following information. *You do not have to answer any of these questions, but we would be very grateful if you would.*

**What is the first part of your postcode?**

**How would you describe yourself?**

- A service-user
- A carer/ unpaid carer (relative/friend/neighbor etc.)
- Member of a Voluntary or community group
- A SWYT staff member
- Other please state .....

**How old are you:**

**What is your ethnicity?**

**What is your gender?**

---

**Are you happy for your comments to be made public? Yes No**
